# Supplementary material for: 17α-ethynylestradiol prevents the natural male-to-female sex change in gilthead seabream (Sparus aurata L.)
Source: PubMed Central journal article supplement (PMC7676269; doi:10.1038/s41598-020-76902-9), 2020-11-18
Supplement: 41598_2020_76902_MOESM1_ESM.pdf [file 41598_2020_76902_MOESM1_ESM.pdf]

# 17 $\alpha$ -ethynylestradiol prevents the natural male-to-female sex change in gilthead seabream (*Sparus aurata* L.)

M. Pilar García Hernández<sup>1\*</sup>, Isabel Cabas<sup>1</sup>, M. Carmen Rodenas<sup>1</sup>, Marta Arizcun<sup>2</sup>  
Elena Chaves-Pozo<sup>2</sup>, Deborah M. Power<sup>3</sup>, Alfonsa García Ayala<sup>1</sup>

## Supplementary data:

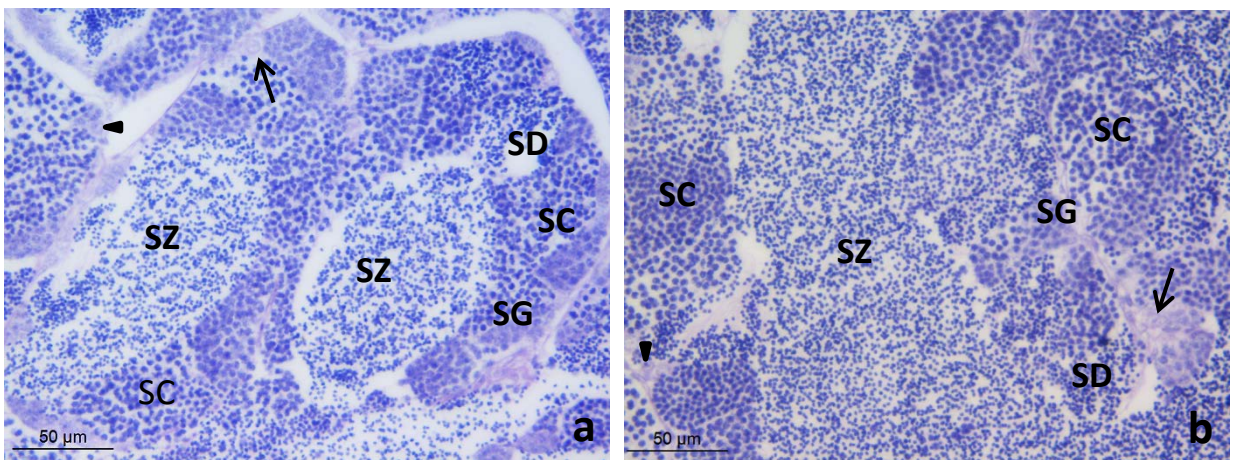

**a-b.** Gonads of male gilthead seabream fed with 0 (control, **a**) or 5 (**b**)  $\mu\text{g}$  of  $\text{EE}_2/\text{g}$  of food for 28 days followed by a recovery period of 333 days of feeding with a standard diet. Both specimen show testis at the spermatogenesis stage with tubules consisting of spermatogonia stem cells ( $\uparrow$ ), primary spermatogonia ( $\downarrow$ ) and cysts of spermatogonia (SG), spermatocytes (SC) and spermatids (SD) and plenty of spermatozoa (SZ) in the lumen. H-E.
